# Supplementary material
Source: publisher figshare collection journal article supplement (https://acs.figshare.com/ndownloader/files/13370006)
Supplement: Supplementary file 1 [file 13370006]

## Supporting Information

# Multivalent Antibody-Nanoparticle Conjugates to Enhance the Sensitivity of SERS-based Immunoassays

Miyeon Lee,<sup>†,‡</sup> Hyeran Kim,<sup>§,‡</sup> Eungwang Kim,<sup>†</sup> So Yeon Yi,<sup>#</sup> Seul Gee Hwang,<sup>§,||</sup>  
Siyeong Yang,<sup>†</sup> Eun-Kyung Lim,<sup>§,||</sup> Bongsoo Kim,<sup>\*,†</sup> Juyeon Jung,<sup>\*,§,||</sup> and Taejoon Kang,<sup>\*,§,||</sup>

<sup>†</sup>Department of Chemistry KAIST, Daejeon 34141, Korea

<sup>§</sup>Hazards Monitoring Bionano Research Center, KRIBB, Daejeon 34141, Korea

<sup>#</sup>BioNano Health Guard Research Center, KRIBB, Daejeon 34141, Korea

<sup>||</sup>Department of Nanobiotechnology, KRIBB School of Biotechnology, UST, Daejeon 34113,  
Korea

### Corresponding Author

\*E-mail: kangtaejoon@kribb.re.kr (T.K.), jjung@kribb.re.kr (J.J.)

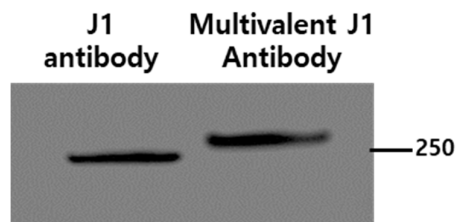

**Figure S1.** (a) Western blot analysis of standard J1 antibody and multivalent J1 antibody.

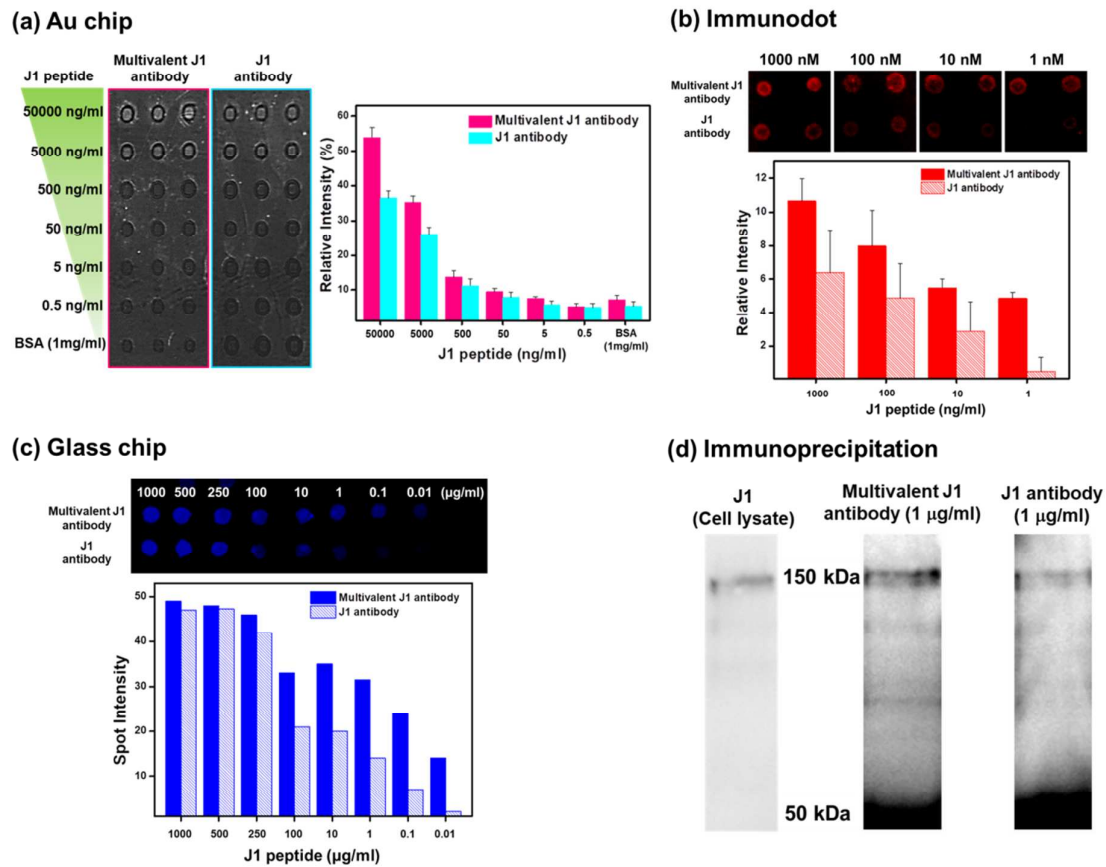

**Figure S2.** Application of the multivalent J1 antibody to various sensor systems. (a) Graph of the 8-bit grayscale values for the multivalent and standard J1 antibody arrays following immobilization on a Au chip at various J1 peptide concentrations (50,000, 5,000, 500, 50, 5, and 0.5 ng/mL). (b) Fluorescence imaging analysis of Cy5-labeled J1 peptide targeting a nitrocellulose membrane spotted with the multivalent or standard J1 antibody (1,000, 100, 10, and 1 ng/mL). The degree of fluorescence at 635 nm was detected. (c) Fluorescence imaging analysis of Cy3-labeled multivalent or standard J1 antibody targeting J1 peptide-spotted glass slides (1,000, 500, 250, 100, and 10 µg/mL). Fluorescence images were captured at 532 nm. (d) Immunoprecipitation of the multivalent J1 antibody/J1 peptide or standard J1 antibody/J1 peptide complex was detected by western blot analysis using horseradish peroxidase-conjugated goat anti-human IgG.

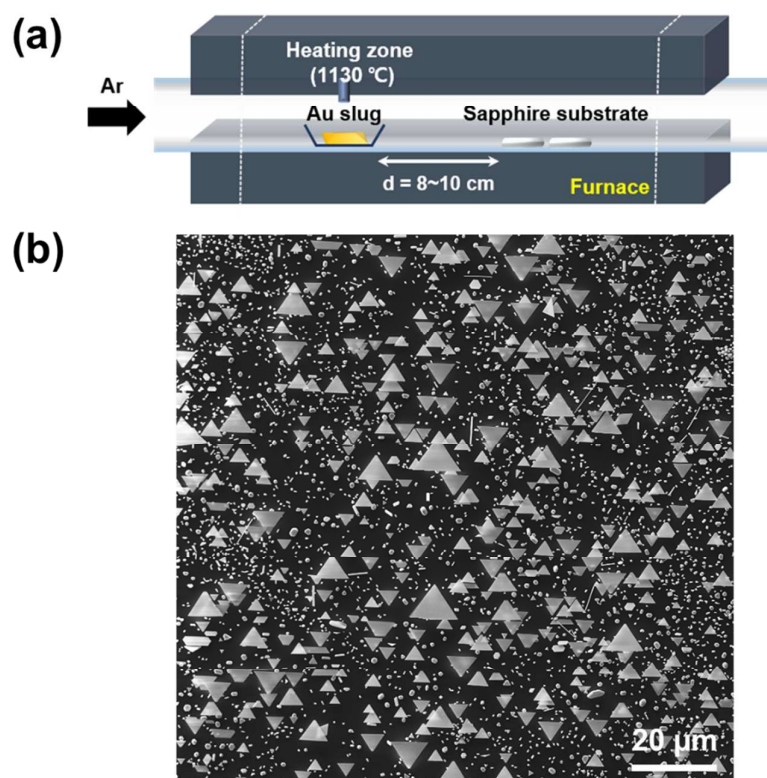

**Figure S3.** (a) Schematic illustration of the experimental setup for the synthesis of Au nanoplates. (b) SEM image of Au nanoplates on substrate.

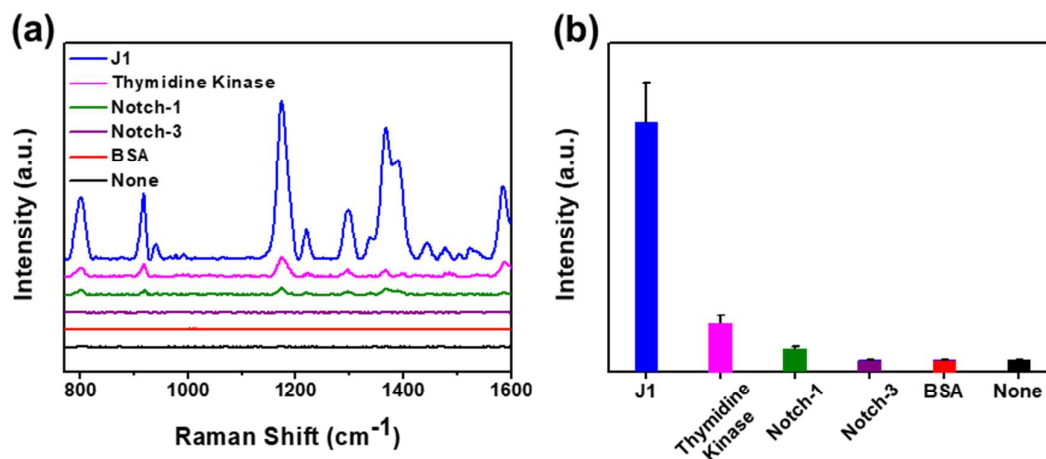

**Figure S4.** (a) SERS spectra of MGITC obtained from MANC-on-nanoplate structures with varying target proteins (J1, notch-1, notch-3, thymidine kinase, and BSA). (b) Plot of band intensity at 1,175 cm<sup>-1</sup> versus the target protein. Data represent the mean plus standard deviation of eight measurements.

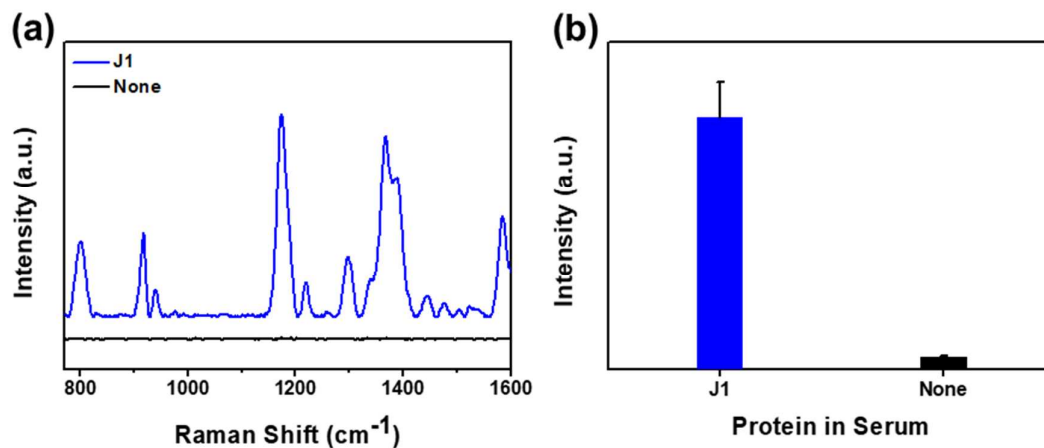

**Figure S5.** (a) SERS spectra of MGITC obtained from MANC-on-nanoplate structures with J1 peptide in serum sample (blue) and control serum sample (black). (b) Plot of band intensity at  $1,175\text{ cm}^{-1}$  versus the sample. Data represent the mean plus standard deviation of eight measurements.

(a) **MANCs**

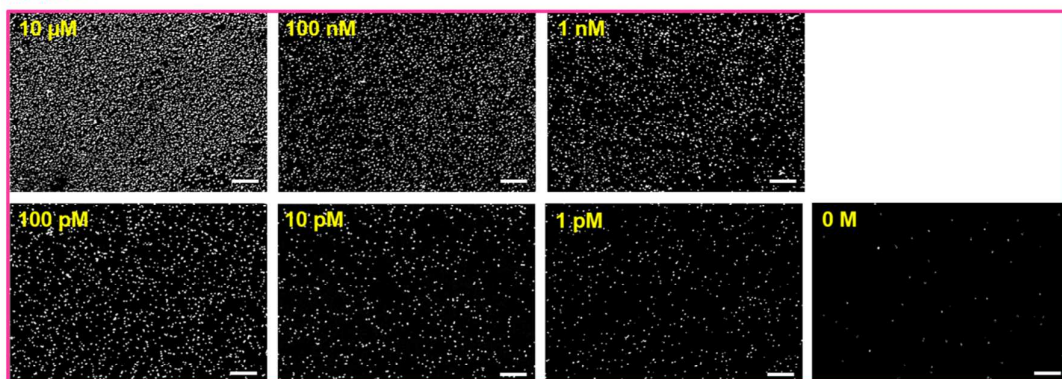

(Scale bar = 500 nm)

(b) **SANCs**

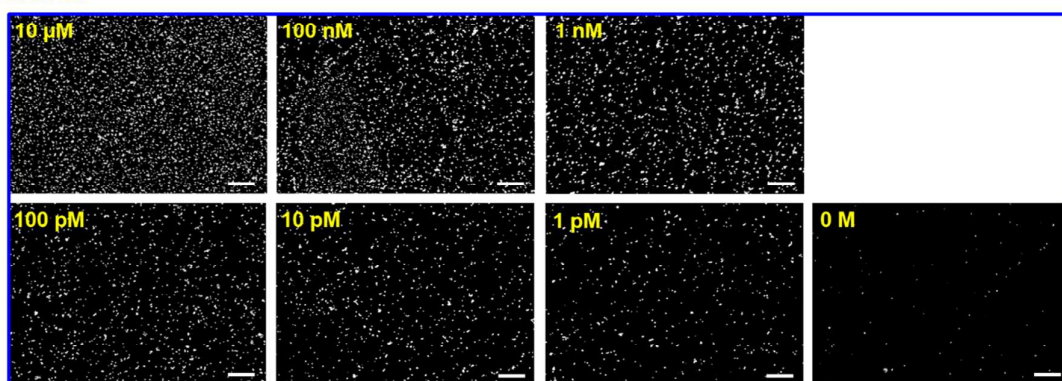

(Scale bar = 500 nm)

**Figure S6.** (a) SEM images of MANC-on-nanoplate structures with varying J1 concentrations. (b) SEM images of SANC-on-nanoplate structures with varying J1 concentrations.
